# Supplementary material
Source: ML conference proceedings conference paper supplement (https://proceedings.neurips.cc/paper_files/paper/2019/hash/56cb94cb34617aeadff1e79b53f38354-Abstract.html)
Supplement: Supplementary file [file 56cb94cb34617aeadff1e79b53f38354-Supplemental.zip]

# Supplementary for

## Learning in Generalized

## Linear Contextual Bandits with Stochastic Delays

### A Table of Parameters

| Notation     | Definition                                                                                 |
|--------------|--------------------------------------------------------------------------------------------|
| $K$          | number of arms                                                                             |
| $d$          | feature dimension                                                                          |
| $\kappa$     | $\inf_{\{\ x\  \leq 1, \ \theta - \theta^*\  \leq 1\}} \dot{g}(x'\theta)$                  |
| $\theta^*$   | unknown parameter in GLCB model                                                            |
| $\sigma$     | sub-Gaussian parameter for noise $\epsilon_t$                                              |
| $L_g$        | upper bound on $\dot{g}$                                                                   |
| $M_g$        | upper bound on $\ddot{g}$                                                                  |
| $\sigma_0^2$ | lower bound on $\lambda_{\min}(\mathbb{E}[\frac{1}{K} \sum_{a \in [K]} x_{t,a} x'_{t,a}])$ |
| $\xi_D$      | tail-envelope distribution for the delays                                                  |
| $q$          | parameter to characterize the tail-envelope distribution $\xi_D$                           |
| $\mu_D$      | expectation of the tail-envelope distribution $\xi_D$                                      |
| $M_D$        | parameter of $\xi_D$                                                                       |
| $\sigma_D$   | parameter of $\xi_D$                                                                       |
| $\sigma_G$   | sub-Gaussian parameter of $G_t$                                                            |
| $\mu'_D$     | expectation of <b>iid</b> delays                                                           |
| $D_{max}$    | upper bound on bounded delays                                                              |

Table 2: Parameters in the GLCB model with delays.

### B Auxiliary Results

**Theorem 8** (Maximum over a finite set, Wainwright (2019)). *Let  $X_1, \dots, X_n$  be centered  $\sigma$ -sub-Gaussian random variables. (i.e.  $\mathbb{E}[\exp(\lambda X_i)] \leq \exp\left(\frac{\lambda^2 \sigma^2}{2}\right)$ ). Then,*

$$\mathbb{E} \left( \max_{1 \leq i \leq n} X_i \right) \leq \sigma \sqrt{2 \log(n)},$$

and

$$\mathbb{E} \left( \max_{1 \leq i \leq n} |X_i| \right) \leq \sigma \sqrt{2 \log(2n)}.$$

Moreover, for any  $t \geq 0$ ,

$$\mathbb{P} \left( \max_{1 \leq i \leq n} X_i > t \right) \leq \exp \left( -\frac{t^2}{2\sigma^2} + \log n \right),$$

and

$$\mathbb{P} \left( \max_{1 \leq i \leq n} |X_i| > t \right) \leq 2 \exp \left( -\frac{t^2}{2\sigma^2} + \log n \right).$$

Note that the random variables in Theorem 8 need not be independent.

**Theorem 9** ( Sub-Gaussian parameter for centered indicator random variables, Ostrovsky and Sirota (2014) ). *Let  $p \in [0, 1]$  and let  $\eta$  be a centered random variable such that  $\mathbb{P}(\eta = 1 - p) = p$  and  $\mathbb{P}(\eta = -p) = 1 - p$ , then*

$$\mathbb{E}[\exp(\lambda\eta)] \leq \exp(\lambda^2 Q(p)),$$

where  $Q(p) = \frac{1-2p}{4 \log(\frac{1-p}{p})}$ .

**Theorem 10** (Hoeffding Bound, Wainwright (2019)). *Let  $X_1, \dots, X_n$  be independent random variables. Assume  $X_i$  has mean  $\mu_i$  and sub-Gaussian parameter  $\sigma_i$ . Then for all  $t \geq 0$ , we have*

$$\mathbb{P}\left(\sum_{i=1}^n (X_i - \mu_i) \geq t\right) \leq \exp\left(-\frac{t^2}{2 \sum_{i=1}^n \sigma_i^2}\right).$$

## C Maximum Likelihood Estimators (MLEs).

We use data with timestamps in  $T_t$  to construct the MLE. Suppose we have independent samples of  $\{Y_s : s \in T_t\}$  condition on  $\{X_s : s \in T_t\}$ . The log-likelihood function of  $\theta$  under (1) is

$$\begin{aligned} \log l(\theta | T_t) &= \sum_{s \in T_t} \left[ \frac{Y_s X_s' \theta - m(X_s' \theta)}{v(\eta)} + B(Y_s, \eta) \right] \\ &= \frac{1}{v(\eta)} \sum_{s \in T_t} [Y_s X_s' \theta - m(X_s' \theta)] + \text{constant}. \end{aligned}$$

Therefore, the MLE can be defined as

$$\hat{\theta}_t \in \arg \max_{\theta \in \Theta} \sum_{s \in T_t} [Y_s X_s' \theta - m(X_s' \theta)].$$

Since  $m$  is differentiable with  $\ddot{m} \geq 0$ , the MLE can be written as the solution of the following equation

$$\sum_{s \in T_t} (Y_s - g(X_s' \theta)) X_s = 0, \quad (12)$$

which is the estimator we use in Step 4 of Algorithm 1.

Note that, the general GLCB, a semi-parametric version of the GLM, is obtained by assuming only that  $\mathbb{E}[Y|X] = g(X'\theta^*)$  (see (2)) without further assumptions on the conditional distribution of  $Y$  given  $X$ . In this case, the estimator obtained by solving (12) is referred to as the *maximum quasi-likelihood estimator*. It is well-documented that this estimator is consistent under very general assumptions as long as matrix  $\sum_{s \in T_t} X_s X_s'$  tends to infinity as  $t \rightarrow \infty$  (Chen et al. (1999); Filippi et al. (2010)).

## D Missing Proofs

In this section, we provide the proofs of Proposition 1, Theorem 2, Proposition 4, Lemma 6, Lemma 7 and Theorem 5.

*Proof of Proposition 1.* Now let us prove the three properties in Proposition 1.

**Property 1.** Let  $\tilde{D}_{k_i}$  be a random variable such that  $\tilde{D}_{k_i} \geq -(\mu_D + M_D)$  almost surely,  $\mathbb{E}[\tilde{D}_{k_i}] \leq 0$  and  $\mathbb{P}(\tilde{D}_{k_i} \geq x) \leq \exp\left(-\frac{x^{1+q}}{2\sigma_D^2}\right)$  for  $x \geq 0$ . One can view  $\tilde{D}_{k_i}$  as a shifted delay.

Define  $\tilde{I}_i = \mathbb{I}(\tilde{D}_{k_i} \geq i) - p_i$  with  $p_i = \mathbb{P}(\tilde{D}_{k_i} \geq i)$ . Then  $\mathbb{P}(\tilde{I}_i = 1 - p_i) = p_i$  and  $\mathbb{P}(\tilde{I}_i = p_i) = 1 - p_i$ . Denote  $\sigma_i = \sqrt{\frac{1-2p_i}{2 \log(\frac{1-p_i}{p_i})}}$ , it is easy to verify that

$$\mathbb{E} \exp(\lambda \tilde{I}_i) = p_i \exp(\lambda(1 - p_i)) + (1 - p_i) \exp(-p_i \lambda) \leq \exp\left(\frac{\sigma_i^2 \lambda^2}{2}\right).$$

Therefore  $\tilde{I}_i$  is sub-Gaussian with parameter  $\sigma_i$ . (Also see Theorem 9.)

We first show that when  $i \geq \max \left\{ {}^{1+q}\sqrt{2 \log(2) \sigma_D^2}, \sqrt[q]{\frac{2\sigma_D^2}{1+q}} + 1 \right\} := I$ , the following two facts hold:

$$p_i \leq \frac{1}{2}, \quad (13)$$

$$\text{and} \quad \exp\left(\frac{i^{1+q}}{2\sigma_D^2}\right) - \exp\left(\frac{(i-1)^{1+q}}{2\sigma_D^2}\right) \geq 1. \quad (14)$$

- When  $i \geq {}^{1+q}\sqrt{2 \log(2) \sigma_D^2}$ ,

$$p_i \leq e^{-\frac{i^{1+q}}{2\sigma_D^2}} \leq \frac{1}{2}.$$

The first inequality holds by Assumption 2 and second inequality holds by simple calculation.

- Define  $h(x) = \exp\left(\frac{x^{1+q}}{2\sigma_D^2}\right)$  with  $q > 0$ , which is differentiable. By Mean Value Theorem,  $h(x) - h(y) = \exp\left(\frac{z^{1+q}}{2\sigma_D^2}\right) \frac{(1+q)z^q}{2\sigma_D^2} (x-y)$  for some  $z \in (x, y)$ . Take  $x = i-1$  and  $y = i$ , for some  $z \in (i-1, i)$ , we have

$$\begin{aligned} \exp\left(\frac{i^{1+q}}{2\sigma_D^2}\right) - \exp\left(\frac{(i-1)^{1+q}}{2\sigma_D^2}\right) &= \exp\left(\frac{z^{1+q}}{2\sigma_D^2}\right) \frac{(1+q)z^q}{2\sigma_D^2} \\ &\geq \frac{(1+q)z^q}{2\sigma_D^2} \geq \frac{(1+q)(i-1)^q}{2\sigma_D^2} \geq 1. \end{aligned} \quad (15)$$

The last inequality in (15) holds since  $i \geq \sqrt[q]{\frac{\sigma_D^2}{1+q}} + 1$ .

Given (13)-(14), when  $i \geq I$  and  $q \geq 0$ ,

$$\sigma_i^2 = \frac{1-2p_i}{2 \log\left(\frac{1-p_i}{p_i}\right)} \leq \frac{1}{2 \log\left(\frac{1-p_i}{p_i}\right)} \quad (16)$$

$$\leq \frac{\sigma_D^2}{(i-1)^{1+q}}. \quad (17)$$

(16) holds since (13) and (17) holds since (14). Therefore

$$\begin{aligned} \sum_{i=I}^{\infty} \sigma_i^2 &= \sum_{i=I}^{\infty} \frac{1-2p_i}{2 \log\left(\frac{1-p_i}{p_i}\right)} \leq \sum_{i=I}^{\infty} \frac{1}{2 \log\left(\frac{1-p_i}{p_i}\right)} \leq \sum_{i=I-1}^{\infty} \frac{\sigma_D^2}{i^{1+q}} \\ &\leq \sigma_D^2 \left(1 + \sum_{i=2}^{\infty} \frac{1}{i^{1+q}}\right) \leq \sigma_D^2 \left(1 + \int_1^{\infty} \frac{1}{x^{(1+q)}} dx\right) = \frac{\sigma_D^2(1+q)}{q}. \end{aligned}$$

It is easy to check that  $\sigma_i^2 = \frac{1-2p_i}{2 \log\left(\frac{1-p_i}{p_i}\right)} \leq \frac{1}{4}$  for all  $p_i \in [0, 1]$ . Therefore,  $\sum_{i=1}^{\infty} \sigma_i^2 \leq \frac{1}{4}I + \frac{\sigma_D^2(1+q)}{q}$ .

Define  $\tilde{G} = \sum_{i=1}^{\infty} \tilde{I}_i$ . combining above result with Theorem 10,  $\tilde{G}$  is sub-Gaussian with parameter  $\sigma_G = \sqrt{\frac{I}{4} + \frac{\sigma_D^2(1+q)}{q}}$ . Similarly, we can show that  $\tilde{G}_t = \sum_{i=1}^t \tilde{I}_i$  is sub-Gaussian with parameter  $\sigma_G = \sqrt{\frac{I}{4} + \frac{\sigma_D^2(1+q)}{q}}$  for any  $t = 1, 2, \dots, T$ .

Recall  $G_t = \sum_{s=1}^{t-1} \mathbb{I}(D_s \geq t-s)$ . When  $t \leq \mu_D + M_D - 1$ ,  $G_t \leq \mu_D + M_D$ . When  $t \geq \mu_D + M_D - 1$ , specifying  $k_i = t - (\mu_D + M_D) - i$  and  $\tilde{D}_{k_i} = D_i - \mu_D - M_D$ ,

$$\begin{aligned}
G_t &= \sum_{s=1}^{t-1} \mathbb{I}(D_s \geq t-s) \\
&= \sum_{s=1}^{t-\mu_D-M_D-1} \mathbb{I}(D_s \geq t-s) + \sum_{s=t-\mu_D-M_D}^{t-1} \mathbb{I}(D_s \geq t-s) \\
&= \sum_{s=t-\mu_D-M_D}^{t-1} \mathbb{I}(D_s \geq t-s) + \sum_{s=1}^{t-\mu_D-M_D-1} \mathbb{I}(D_s - \mu_D - M_D \geq t-s - \mu_D - M_D) \\
&\leq \mu_D + M_D + \sum_{s=1}^{t-\mu_D-M_D-1} \mathbb{I}(D_s - \mu_D - M_D \geq t-s - \mu_D - M_D) \\
&= \mu_D + M_D + \sum_{i=1}^{t-\mu_D-M_D-1} \mathbb{I}(D_{t-(\mu_D+M_D)-i} - \mu_D - M_D \geq i) \quad (i = t-s-\mu_D-M_D) \\
&= \mu_D + M_D + \sum_{i=1}^{t-\mu_D-M_D-1} \mathbb{I}(\tilde{D}_{k_i} \geq i)
\end{aligned}$$

Hence,

$$\begin{aligned}
G_t &\leq \sum_{i=1}^{t-\mu_D-M_D-1} [\mathbb{I}(\tilde{D}_{k_i} \geq i) - p_i] + \left( \sum_{i=1}^{t-\mu_D-M_D-1} p_i \right) + \mu_D + M_D \\
&= \mu_D + M_D + \sum_{i=1}^{t-\mu_D-M_D-1} \tilde{I}_i + \left( \sum_{i=1}^{t-\mu_D-M_D-1} p_i \right) \\
&\leq \mu_D + M_D + \sum_{i=1}^{t-\mu_D-M_D-1} \tilde{I}_i + (\mu_D + M_D) \\
&= \tilde{G}_{t-\mu_D-M_D-1} + 2(\mu_D + M_D)
\end{aligned} \tag{18}$$

Therefore, we arrive at  $G_t \leq \tilde{G}_{t-\mu_D-M_D-1} + 2(\mu_D + M_D)$  with specific choice of  $k_i = t - (\mu_D + M_D) - i$  and  $\tilde{D}_{k_i} = D_i - \mu_D - M_D$ .

Given the fact that  $\mathbb{E}[\tilde{G}_t] = 0$  and  $\tilde{G}_t$  is sub-Gaussian with parameter  $\sigma_G$ ,  $G_t$  satisfies

$$\mathbb{P}(G_t \geq 2(\mu_D + M_D) + x) \leq \exp\left(\frac{-x^2}{2\sigma_G^2}\right). \tag{19}$$

**Property 2.** Further define  $\tilde{G}_T^* = \max_{1 \leq t \leq T} \{\tilde{G}_t\}$  as the running maximum of correlated sub-exponentials  $\tilde{G}_t$  up to time  $T$ , from Theorem 8, we have

$$\mathbb{E}[\tilde{G}_T^*] \leq \sigma_G \sqrt{2 \log T}.$$

By the union bound,

$$\begin{aligned}
\mathbb{P}\left(\tilde{G}_T^* \geq \sigma_G \sqrt{2 \log T} + x\right) &\leq \sum_{t=1}^T \mathbb{P}\left(\tilde{G}_t \geq \sigma_G \sqrt{2 \log T} + x\right) \\
&\leq T \exp\left(-\frac{(\sigma_G \sqrt{2 \log T} + x)^2}{2\sigma_G^2}\right) \\
&= T \exp\left(-\frac{x^2}{2\sigma_G^2} - \frac{2x\sigma_G \sqrt{2 \log T}}{2\sigma_G^2} - \log T\right) \\
&= \exp\left(-\frac{x^2}{2\sigma_G^2} - \frac{2x\sigma_G \sqrt{2 \log T}}{2\sigma_G^2}\right) \\
&\leq \exp\left(-\frac{x^2}{2\sigma_G^2}\right).
\end{aligned}$$

Therefore, with probability  $1 - \delta$ ,

$$\tilde{G}_T^* \leq \sigma_G \sqrt{2 \log(T)} + \sigma_G \sqrt{2 \log\left(\frac{1}{\delta}\right)}.$$

Recall that  $G_T^* = \max_{1 \leq t \leq T} G_t$ . When  $T \leq \mu_D + M_D - 1$ ,  $G_T^* \leq \mu_D + M_D$ . When  $T \geq \mu_D + M_D - 1$ , specifying  $k_i = T - (\mu_D + M_D) - i$  and  $\tilde{D}_{k_i} = D_{k_i} - \mu - M$ , we have

$$G_T^* \leq \tilde{G}_T^* + 2(\mu_D + M_D).$$

The derivation is similar to the analysis in (18).

Therefore, with probability  $1 - \delta$ , we have

$$G_T^* \leq 2(\mu_D + M_D) + \sigma_G \sqrt{2 \log(T)} + \sigma_G \sqrt{2 \log\left(\frac{1}{\delta}\right)}.$$

**Property 3.** Given a fixed  $G_t$  ( $t = 1, 2, \dots, T$ ), from Vershynin (2010) and Li et al. (2017),  $\lambda_{\min}(W_t) \geq B$  with probability  $1 - \delta$ , when

$$t \geq \left(\frac{C_1 \sqrt{d} + C_2 \sqrt{\log(\frac{1}{\delta})}}{\lambda_{\min}(\Sigma)}\right)^2 + \frac{2B}{\lambda_{\min}(\Sigma)} + G_t. \quad (20)$$

Combining above with (19), we have the desired result.  $\square$

*Proof of Theorem 2.* We first bound the one-step regret. To do so, fix  $t$  and let  $X_t^* = x_{t,a_t^*}$  and  $\Delta_t = \hat{\theta}_t - \theta^*$ , where  $a_t^* = \arg \max_{a \in [K]} \mu(x_{t,a}^* \theta^*)$  is an optimal action at round  $t$ . The selection of  $a_t$  in DUCB-GLCB implies

$$\langle X_t^*, \hat{\theta}_t \rangle + \beta_t \|X_t^*\|_{V_t^{-1}} \leq \langle X_t, \hat{\theta}_t \rangle + \beta_t \|X_t\|_{V_t^{-1}}.$$

Then we have

$$\langle X_t^*, \theta^* \rangle - \langle X_t, \theta^* \rangle = \langle X_t^* - X_t, \hat{\theta}_t \rangle - \langle X_t^* - X_t, \hat{\theta}_t - \theta^* \rangle \quad (21)$$

$$\leq \beta_t (\|X_t\|_{V_t^{-1}} - \|X_t^*\|_{V_t^{-1}}) + \|X_t^* - X_t\|_{V_t^{-1}} \|\Delta\|_{V_t}. \quad (22)$$

Therefore, to bound  $\langle X_t^*, \theta^* \rangle - \langle X_t, \theta^* \rangle$ , it suffices to bound  $\|\Delta\|_{V_t}$  and  $\|X_t\|_{V_t^{-1}}$ .

Suppose  $\lambda_{\min}(W_{\tau+1}) \geq 1$ , for any  $\delta \in [\frac{1}{T}, 1)$  define event

$$\mathcal{E}_\Delta := \left\{ \|\Delta\|_{W_t} \leq \frac{\sigma}{\kappa} \sqrt{\frac{d}{2} \log\left(1 + \frac{2(t - G_t)}{d}\right) + \log\left(\frac{1}{\delta}\right)} \right\}.$$

From Lemma 2 in (Li et al. (2017)), then event  $\mathcal{E}_\Delta$  holds for all  $t \geq \tau$  with probability at least  $1 - \delta$ .

$$\begin{aligned}
\|\Delta_t\|_{V_t}^2 &= \Delta_t' V_t \Delta_t = \Delta_t' \left( W_t + \sum_{s \in M_t} X_s X_s' \right) \Delta_t \\
&= \Delta_t' W_t \Delta_t + \sum_{s \in M_t} \Delta_t' X_s X_s' \Delta_t \\
&\leq \Delta_t' W_t \Delta_t + \sum_{s \in M_t} \|\Delta_t\|^2 \|X_s\|^2 \\
&\leq \|\Delta_t\|_{W_t}^2 + G_t \|\Delta_t\|^2.
\end{aligned}$$

When  $\lambda_{\min}(W_t) \geq 16\sigma^2 \frac{d+\log(\frac{1}{\delta})}{\kappa^2}$ , from Lemma 7 in (Li et al. (2017)), with probability  $1 - \delta$ ,

$$\|\Delta_t\|^2 \leq \frac{4\sigma}{\kappa} \sqrt{\frac{d+\log(\frac{1}{\delta})}{\lambda_{\min}(W_t)}} \leq 1.$$

Therefore, when  $\lambda_{\min}(W_t) \geq 16\sigma^2 \frac{d+\log(\frac{1}{\delta})}{\kappa^2}$ , with probability  $1 - 2\delta$ ,

$$\begin{aligned}
\|\Delta_t\|_{V_t} &\leq \sqrt{\frac{\sigma^2}{\kappa^2} \left( \frac{d}{2} \log \left( 1 + \frac{2(t-G_t)}{d} \right) + \log \left( \frac{1}{\delta} \right) \right) + G_t} \\
&\leq \frac{\sigma}{\kappa} \sqrt{\frac{d}{2} \log \left( 1 + \frac{2(t-G_t)}{d} \right) + \log \left( \frac{1}{\delta} \right) + \sqrt{G_t}}. \tag{23}
\end{aligned}$$

Let us come back to the satisfaction of conditions  $\lambda_{\min}(W_t) \geq 16\sigma^2 \frac{d+\log(\frac{1}{\delta})}{\kappa^2}$  and  $\lambda_{\min}(W_{\tau+1}) \geq 1$ .

From Proposition 1,  $\lambda_{\min}(W_t) \geq \max \left\{ 1, 16\sigma^2 \frac{d+\log(\frac{1}{\delta})}{\kappa^2} \right\}$  with probability  $1 - 2\delta$ , when

$$t \geq \left( \frac{C_1 \sqrt{d} + C_2 \sqrt{\log(\frac{1}{\delta})}}{\lambda_{\min}(\Sigma)} \right)^2 + \frac{2 \max\{1, 16\sigma^2 \frac{d+\log(\frac{1}{\delta})}{\kappa^2}\}}{\lambda_{\min}(\Sigma)} + 2(\mu_D + M_D) + \sigma_G \sqrt{2 \log \left( \frac{1}{\delta} \right)} := \tau. \tag{24}$$

We now choose  $\beta_t = \frac{\sigma}{\kappa} \sqrt{\frac{d}{2} \log \left( 1 + \frac{2(t-G_t)}{d} \right) + \log(\frac{1}{\delta}) + \sqrt{G_t}}$ . If  $\mathcal{E}_t$  holds for all  $t \geq \tau$ , then,

$$\langle X_t^*, \theta^* \rangle - \langle X_t, \theta^* \rangle \leq \beta_t \left( \|X_t\|_{V_t^{-1}} - \|X_t^*\|_{V_t^{-1}} + \|X_t^* - X_t\|_{V_t^{-1}} \right). \tag{25}$$

Suppose there is an integer  $m$  such that  $\lambda_{\min}(V_{m+1}) \geq 1$ , from Lemma 2 in Li et al. (2017), we have

$$\sum_{t=m+1}^{m+n} \|X_t\|_{V_t^{-1}} \leq \sqrt{2dn \log \left( \frac{n+m}{d} \right)}. \tag{26}$$

for all  $n \geq 0$ . Combine (25) and (26), we have

$$\begin{aligned}
\sum_{t=\tau+1}^T (\langle X_t^*, \theta^* \rangle - \langle X_t, \theta^* \rangle) &\leq 2 \max_{1 \leq t \leq T} \{\beta_t\} \sqrt{2Td \log \left( \frac{T}{d} \right)} \\
&\leq 2 \left[ \frac{\sigma}{\kappa} \sqrt{\frac{d}{2} \log \left( 1 + \frac{2T}{d} \right) + \log \left( \frac{1}{\delta} \right) + \sqrt{G_T^*}} \right] \sqrt{2Td \log \left( \frac{T}{d} \right)} \\
&\leq 2\sqrt{G_T^*} \sqrt{2Td \log \left( \frac{T}{d} \right)} + \frac{2d\sigma}{\kappa} \log \left( \frac{T}{d\delta} \right) \sqrt{T}.
\end{aligned}$$

Note that  $g$  is an increasing Lipschitz function with Lipschitz constant  $L_g$  and the  $g$  function is bounded between 0 and 1. The regret of algorithm DUCB-GLCB can be upper bounded as

$$\begin{aligned} R_T &\leq \tau + L_g \sum_{t=\tau+1}^T (\langle X_t^*, \theta^* \rangle - \langle X_t, \theta^* \rangle) \\ &\leq \tau + L_g \left( 2\sqrt{G_T^*} \sqrt{2Td \log \left( \frac{T}{d} \right)} + \frac{2d\sigma}{\kappa} \log \left( \frac{T}{d\delta} \right) \sqrt{T} \right). \end{aligned} \quad (27)$$

Combining with the results in (6), (23) and (24), with probability  $1 - 5\delta$ ,

$$\begin{aligned} R_T &\leq \tau + L_g \left[ 2 \left( \sqrt{2(\mu_D + M_D)} + \sqrt{\sigma_G} (2 \log(T))^{1/4} + \sqrt{\sigma_G} \left( 2 \log \left( \frac{1}{\delta} \right) \right)^{1/4} \right) \sqrt{2Td \log \left( \frac{T}{d} \right)} \right. \\ &\quad \left. + \frac{2d\sigma}{\kappa} \log \left( \frac{T}{d\delta} \right) \sqrt{T} \right] \\ &= \tau + L_g \left[ 4\sqrt{\mu_D + M_D} \sqrt{Td \log \left( \frac{T}{d} \right)} + 2^{7/4} \sqrt{\sigma_G} \left( \log \left( \frac{1}{\delta} \right) \right)^{1/4} \sqrt{d \log \left( \frac{T}{d} \right) T} \right. \\ &\quad \left. + 2^{7/4} \sqrt{\sigma_G} (\log(T))^{1/4} \sqrt{d \log \left( \frac{T}{d} \right) T} + \frac{2d\sigma}{\kappa} \log \left( \frac{T}{d\delta} \right) \sqrt{T} \right]. \end{aligned}$$

□

*Proof of Proposition 4.* When there exists an upper bound  $D_{\max}$  on the delay, Proposition 1 can be improved as follows.

Then there exist positive, universal constants  $C_1$  and  $C_2$  such that  $\lambda_{\min}(W_t) \geq B$  with probability at least  $1 - \delta$ , as long as

$$t \geq \left( \frac{C_1 \sqrt{d} + C_2 \sqrt{\log(\frac{1}{\delta})}}{\lambda_{\min}(\Sigma)} \right)^2 + \frac{2B}{\lambda_{\min}(\Sigma)} + D_{\max}.$$

Along with the fact that event (23) holds for all  $t \geq \tau$  with probability at least  $1 - 2\delta$ , we have with probability  $1 - 3\delta$ ,

$$(27) \leq \tau + L_g \left( 2\sqrt{D_{\max}} \sqrt{2Td \log \left( \frac{T}{d} \right)} + \frac{2d\sigma}{\kappa} \log \left( \frac{T}{d\delta} \right) \sqrt{T} \right).$$

That is,  $O(R_T) = O(\sqrt{D_{\max}} \sqrt{dT \log(T)} + d\sqrt{T} \log(T))$

When  $\{D_t\}_{t=1}^T$  are iid with mean  $\mu'_D$ ,

$$\begin{aligned} \mathbb{E}[G_t] &= \mathbb{E} \left[ \sum_{s=1}^{t-1} \mathbb{I}(s + D_s \geq t) \right] = \sum_{s=1}^{t-1} \mathbb{P}(s + D_s \geq t) \leq \mu'_D, \\ \mathbb{V}[G_t] &= \mathbb{V} \left[ \sum_{s=1}^{t-1} \mathbb{I}(s + D_s \geq t) \right] \leq \sum_{s=1}^{t-1} \mathbb{P}(s + D_s \geq t) \leq \mu'_D. \end{aligned}$$

Therefore, with probability  $1 - 5\delta$ ,

$$\begin{aligned} (27) &\leq \tau + L_g \left[ 4\sqrt{\mu'_D} \sqrt{Td \log \left( \frac{T}{d} \right)} + 2^{7/4} \sqrt{\sigma_G} \left( \log \left( \frac{1}{\delta} \right) \right)^{1/4} \sqrt{d \log \left( \frac{T}{d} \right) T} \right. \\ &\quad \left. + 2^{7/4} \sqrt{\sigma_G} (\log(T))^{1/4} \sqrt{d \log \left( \frac{T}{d} \right) T} + \frac{2d\sigma}{\kappa} \log \left( \frac{T}{d\delta} \right) \sqrt{T} \right]. \end{aligned}$$

□

*Proof of Lemma 6.* Define

$$\begin{aligned} s_{t,a} &= \sqrt{x_{t,a}^T A_t^{-1} x_{t,a}} \in \mathbb{R}_+ \\ B_t &= [x_{\tau,a_\tau}^T]_{\tau \in \Psi_t} \in \mathbb{R}^{|\Psi_t| \times d} \\ C_t &= [\mathbb{I}(D_\tau + \tau < t - 1) x_{\tau,a_\tau}^T]_{\tau \in \Psi_t} \in \mathbb{R}^{|\Psi_t| \times d} \\ Z_t &= [y_{\tau,a_\tau}]_{\tau \in \Psi_t} \in \mathbb{R}^{|\Psi_t| \times 1}. \end{aligned}$$

Then  $A_t = I_d + B_t^T B_t$  and  $c_t = C_t^T Z_t$ . (Note that  $A_t$  and  $c_t$  are defined in Algorithm 2.)

$$\begin{aligned} \hat{y}_{t,a} - x'_{t,a} \theta^* &= x'_{t,a} \theta_t - x'_{t,a} \theta^* \\ &= x'_{t,a} A_t^{-1} c_t - x'_{t,a} A_t^{-1} (I_d + B_t^T B_t) \theta^* \\ &= x'_{t,a} A_t^{-1} C_t^T Z_t - x'_{t,a} A_t^{-1} (\theta^* + B_t^T B_t \theta^*) \\ &= x'_{t,a} A_t^{-1} B_t^T (Z_t - B_t \theta^*) + x'_{t,a} A_t^{-1} (C_t - B_t)^T Z_t - x'_{t,a} A_t^{-1} \theta^*. \end{aligned}$$

Since  $\|\theta^*\| \leq 1$ ,

$$|\hat{y}_{t,a} - x'_{t,a} \theta^*| \leq |x'_{t,a} A_t^{-1} B_t^T (Z_t - B_t \theta^*)| + \|x'_{t,a} A_t^{-1}\| \|(C_t - B_t)^T Z_t\| + \|x'_{t,a} A_t^{-1} \theta^*\|.$$

Due to the statistical independence of samples indexed in  $\Psi_t$ , we have  $\mathbb{E}[Z_t - B_t \theta^*] = 0$ . Denote  $\bar{\alpha} = \sqrt{\frac{1}{2} \ln \left( \frac{2TK}{\delta} \right)}$ , following the analysis in (Chu et al., 2011, Lemma 1), we have

$$\mathbb{P}(|x'_{t,a} A_t^{-1} B_t^T (Z_t - B_t \theta^*)| > \bar{\alpha} s_{t,a}) \leq 2 \exp \left( -\frac{2\bar{\alpha}^2 s_{t,a}^2}{\|B_t A_t^{-1} x_{t,a}\|^2} \right) \leq 2 \exp(-2\bar{\alpha}^2) = \frac{\delta}{TK},$$

and  $\|A_t^{-1} x_{t,a}\| \leq s_{t,a}$ .

Further notice that  $\|(B_t - C_t)^T Z_t\| \leq G_t$ . Combining above facts, we arrive at the desired result. □

*Proof of Lemma 7.* By Lemma 3 in Chu et al. (2011), for any  $s \in [S]$ ,

$$\sum_{\tau \in \Psi_{T+1}^s} s_{\tau,a_\tau} \leq 5\sqrt{d|\Psi_{T+1}^s| \log |\Psi_{T+1}^s|}.$$

Hence,

$$\begin{aligned} \sum_{\tau \in \Psi_{T+1}^s} w_{\tau,a_\tau} &= \sum_{\tau \in \Psi_{T+1}^s} \alpha_\tau s_{\tau,a_\tau} \\ &\leq 5(\bar{\alpha} + G_T^* + 1) \sqrt{d|\Psi_{T+1}^s| \log |\Psi_{T+1}^s|} \\ &\leq 5\sqrt{2}\bar{\alpha}(\bar{\alpha} + G_T^* + 1) \sqrt{d|\Psi_{T+1}^s|}. \end{aligned} \tag{28}$$

(28) holds since  $\sqrt{2}\bar{\alpha} \geq \sqrt{\log T} \geq \sqrt{\log |\Psi_{T+1}^s|}$ . On the other hand, by Step 13 of Algorithm 3 (SupLinUCB) in Chu et al. (2011),

$$\sum_{\tau \in \Psi_{T+1}^s} w_{\tau,a_\tau} \geq 2^{-s} |\Psi_{T+1}^s|. \tag{29}$$

Therefore,

$$|\Psi_{T+1}^s| \leq 2^s 5\sqrt{2}\bar{\alpha}(\bar{\alpha} + G_T^* + 1) \sqrt{d|\Psi_{T+1}^s|}$$

□



*Sketch proof of Theorem 5.* Denote  $\Phi_0$  be the set of trails for which an alternative is chosen in step 7-8 of Algorithm 3. Since  $2^{-S} \leq \frac{1}{\sqrt{T}}$  we have  $\{1, 2, \dots, T\} = \Phi_0 \cup_s \Phi_{T+1}^s$ .

$$\begin{aligned} \mathbb{E}[R_T] &= \sum_{t=1}^T [\mathbb{E} \langle X_t^*, \theta^* \rangle - \mathbb{E} \langle X_t, \theta^* \rangle] \\ &= \sum_{t \in \Phi_0} [\mathbb{E} \langle X_t^*, \theta^* \rangle - \mathbb{E} \langle X_t, \theta^* \rangle] + \sum_{s=1}^S \sum_{t \in \Phi_{T+1}^s} [\mathbb{E} \langle X_t^*, \theta^* \rangle - \mathbb{E} \langle X_t, \theta^* \rangle] \\ &\leq \frac{2}{\sqrt{T}} |\Phi_0| + \sum_{s=1}^S 8 \cdot 2^{-s} |\Phi_{T+1}^s| \end{aligned} \quad (30)$$

$$\leq \frac{2}{\sqrt{T}} |\Phi_0| + \sum_{s=1}^S 40(\sqrt{2\bar{\alpha}}(G_T^* + \bar{\alpha} + 1)) \sqrt{d} |\Phi_{T+1}^s| \quad (31)$$

$$\leq 2\sqrt{T} + 40(\sqrt{2\bar{\alpha}}(G_T^* + \bar{\alpha} + 1))\sqrt{STd} \quad (32)$$

with probability  $1 - \delta S$ . (30) holds by (Auer, 2002, Lemma 15) or (Chu et al., 2011, Lemma 5), (31) holds by Lemma 7, and (32) holds by some simple calculations.

Apply the Azuma-Hoeffding bound (Auer, 2002, Lemma 8) with  $\alpha_\tau = 2$  and  $B = 4\sqrt{T \log(\frac{2}{\delta})}$ , we have

$$R_T \leq 2\sqrt{T} + 46 \left( \sqrt{2\bar{\alpha}}(G_T^* + \bar{\alpha} + 1) \right) \sqrt{STd}, \quad (33)$$

with probability  $1 - \delta(S+1)$ . Recall that  $\bar{\alpha} = \sqrt{\frac{1}{2} \ln \left( \frac{2TK}{\delta} \right)}$ . Replacing  $\delta$  by  $\delta/(S+1)$ , substituting  $S = \log(T)$ , and combining with the result in (6) yields

$$\begin{aligned} R_T \leq & 2\sqrt{T} + 46\sqrt{\log(T)Td} \left( \sqrt{2} \sqrt{\frac{1}{2} \log \left( \frac{2TK(\log(T)+1)}{\delta} \right)} (2(\mu_D + M_D)) \right. \\ & \left. + \sigma_G \sqrt{2 \log(T)} + \sigma_G \sqrt{2 \log \left( \frac{1}{\delta} \right)} + \sqrt{\frac{1}{2} \log \left( \frac{2TK(\log(T)+1)}{\delta} \right)} + 1 \right) \end{aligned}$$

with probability  $1 - 2\delta$ . □
